# Supplementary figures and images for: Near-infrared photodetectors based on CH3NH3PbI3 perovskite single crystals for bioimaging applications
Source: Royal Society of Chemistry journal article supplement (doi:10.1039/d1tc04961e), 2021-12-08

## Supplemental File

**Fig. S1.** XRD Rietveld refinement result of the  $\text{CH}_3\text{NH}_3\text{PbI}_3$  powder.

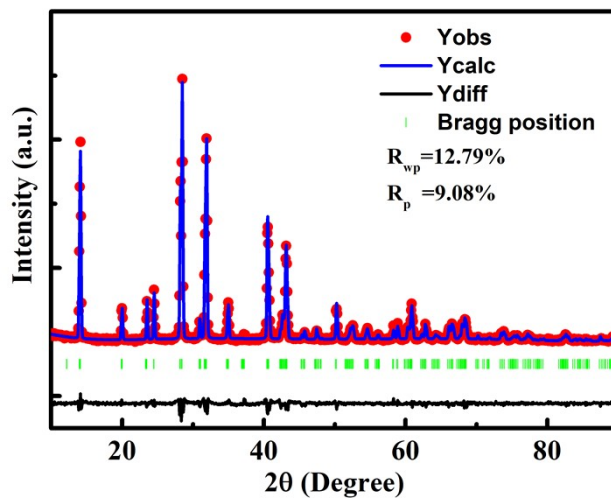

Supplement: d1tc04961e1.pdf [file d1tc04961e1.pdf]
